# Supplementary material for: Uptake of COVID-19 vaccinations amongst 3,433,483 children and young people: meta-analysis of UK prospective cohorts
Source: Springer Nature journal article supplement (doi:10.1038/s41467-024-46451-0), 2024-03-15
Supplement: MOESM1 [file 41467_2024_46451_MOESM1_ESM.pdf]

# Supplementary material

## Contents

|                            |    |
|----------------------------|----|
| Vaccine schedule.....      | 2  |
| Results.....               | 3  |
| Sensitivity analysis ..... | 9  |
| Cohort selection.....      | 16 |

## Vaccine schedule

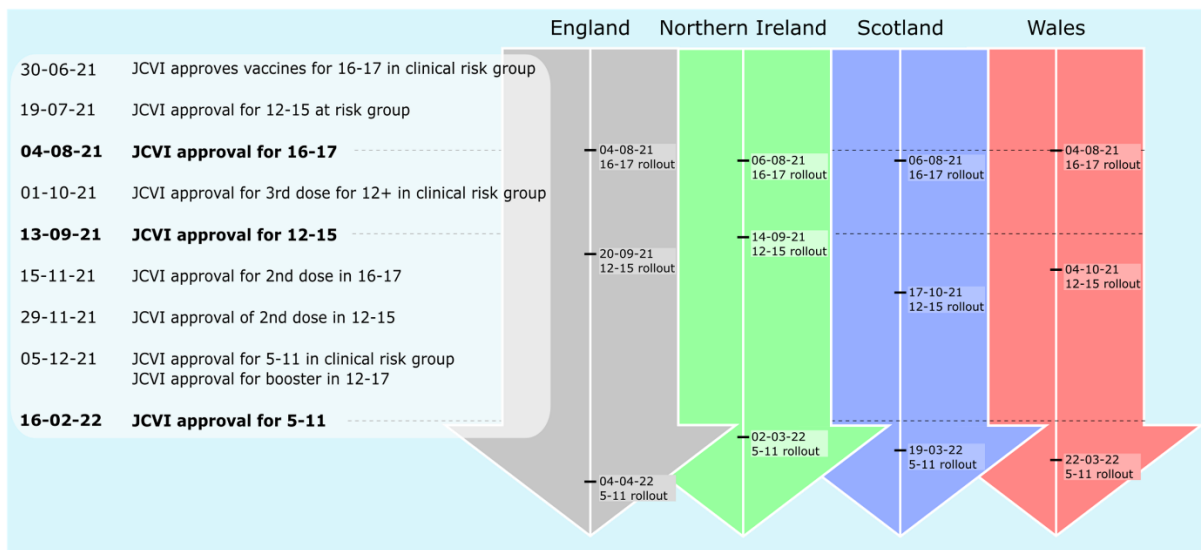

Supplementary Figure 1 The COVID-19 vaccination rollout for CYP in England, Northern Ireland, Scotland and Wales compared to the JCVI approval schedule.

# Results

Supplementary Table 1 Cohort breakdown for each variable and the total number of infections by country

|                                      |                                                         | England          |           | Northern Ireland |         | Scotland |         | Wales   |         |
|--------------------------------------|---------------------------------------------------------|------------------|-----------|------------------|---------|----------|---------|---------|---------|
|                                      |                                                         | n                | %         | n                | %       | n        | %       | n       | %       |
| <b>Sex</b>                           | Male                                                    | 1,123,212        | 51        | 163,342          | 51      | 291,267  | 51      | 186,970 | 51      |
|                                      | Female                                                  | 1,069,729        | 49        | 155,095          | 49      | 278,145  | 49      | 178,280 | 49      |
| <b>Age group</b>                     | 5-11                                                    | 1,136,520        | 52        | 185,591          | 58      | 301,774  | 53      | 193,920 | 53      |
|                                      | 12-15                                                   | 728,283          | 33        | 92,537           | 29      | 182,456  | 32      | 126,960 | 35      |
|                                      | 16 - 17                                                 | 328,138          | 15        | 40,309           | 13      | 85,182   | 15      | 44,370  | 12      |
| <b>Number of people in household</b> | 2                                                       | 145,359          | 7         | 16,730           | 5       | 60,738   | 11      | 19,030  | 5       |
|                                      | 3                                                       | 437,686          | 20        | 55,220           | 17      | 144,266  | 25      | 66,460  | 18      |
|                                      | 4                                                       | 763,892          | 35        | 101,708          | 32      | 205,297  | 36      | 131,100 | 36      |
|                                      | 5+                                                      | 846,004          | 39        | 144,779          | 46      | 159,111  | 28      | 148,650 | 41      |
|                                      | <b>Household vaccination status</b>                     | Fully vaccinated | 1,625,171 | 74               | 187,804 | 59       | 523,333 | 92      | 264,470 |
|                                      | Partially vaccinated                                    | 329,259          | 15        | 72,416           | 23      | 28,274   | 5       | 61,900  | 17      |
|                                      | Unvaccinated                                            | 238,511          | 11        | 58,217           | 18      | 17,805   | 3       | 38,880  | 11      |
| <b>Infection</b>                     | Individuals who became infected during the study period | 307695           | 14        | 43838            | 14      | 55656    | 10      | 44428   | 12      |

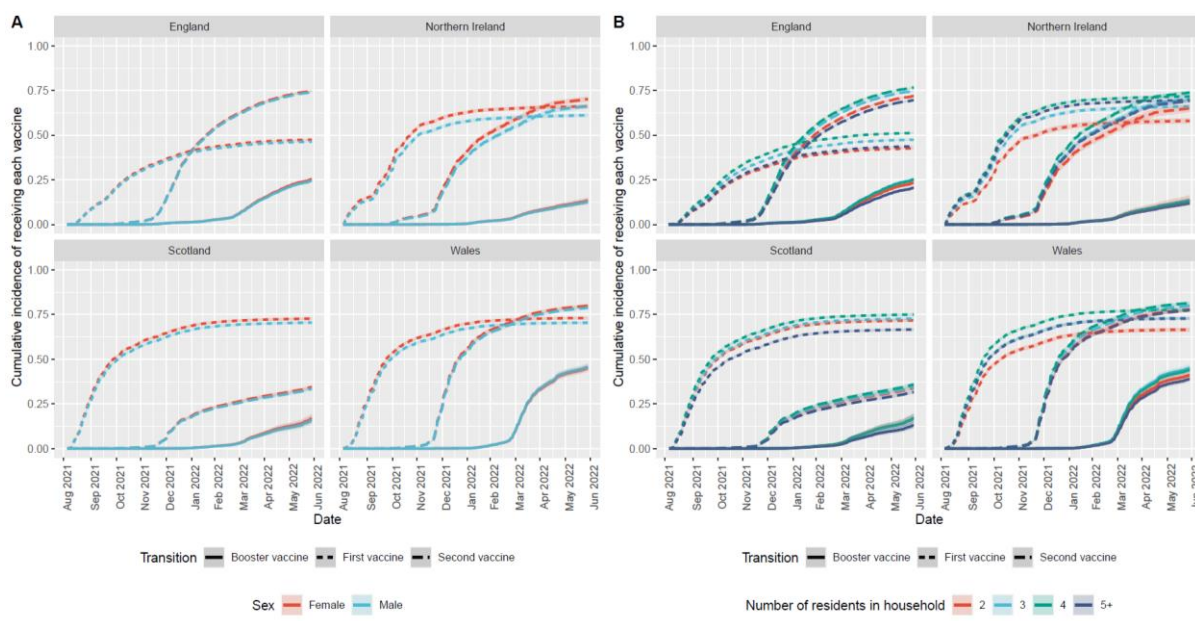

Supplementary Figure 2 Cumulative incidence: The estimated cumulative incidence and 95% confidence intervals for vaccine uptake in each country for each vaccine in a. males vs females and b. household size. All results are relative to the reference group.

Supplementary Table 2 Multistate model output. Adjusted hazard ratio and 95% confidence intervals for all transitions within each nation for each demographic variable. The reference for each group is aged 16-17, a household occupancy of 3, and a partially vaccinated household. Asterisk indicates significance of two tailed P values, \*\*P<0.05, \*\*\*P<0.01.

| Country          | Transition | Male                    | Age 12-15               | Age 5-11                | Household<br>n = 2      | Household<br>n = 4      | Household<br>n = 5      | Unvaccinated            | Fully vaccinated        |
|------------------|------------|-------------------------|-------------------------|-------------------------|-------------------------|-------------------------|-------------------------|-------------------------|-------------------------|
| England          | 1          | 0.93<br>(0.92, 0.94)*** | 1.32<br>(1.3, 1.33)***  | 0.26<br>(0.25, 0.26)*** | 0.9<br>(0.88, 0.92)***  | 1.09<br>(1.08, 1.1)***  | 0.88<br>(0.87, 0.89)*** | 0.67<br>(0.65, 0.68)*** | 1.56<br>(1.54, 1.58)*** |
|                  | 2          | 0.97<br>(0.96, 0.97)*** | 0.72<br>(0.72, 0.72)*** | 0.11<br>(0.11, 0.11)*** | 0.86<br>(0.85, 0.87)*** | 1.11<br>(1.11, 1.12)*** | 0.89<br>(0.89, 0.9)***  | 0.11<br>(0.11, 0.11)*** | 2.83<br>(2.8, 2.85)***  |
|                  | 3          | 1.51<br>(0.83, 2.76)    | 0.24<br>(0.11, 0.51)*** | 0.36<br>(0.16, 0.86)**  | 1.71<br>(0.61, 4.84)    | 0.92<br>(0.39, 2.15)    | 0.93<br>(0.41, 2.14)    | 0.95<br>(0.31, 2.93)    | 1.54<br>(0.65, 3.66)    |
|                  | 4          | 1.01<br>(1, 1.01)**     | 1.25<br>(1.23, 1.26)*** | 2.17<br>(2.14, 2.19)*** | 1.02<br>(1, 1.03)**     | 0.99<br>(0.98, 1)**     | 1.04<br>(1.03, 1.05)*** | 1.11<br>(1.09, 1.13)*** | 0.87<br>(0.86, 0.88)*** |
|                  | 5          | 0.98<br>(0.96, 0.99)**  | 0.98<br>(0.96, 0.99)*** | 0.11<br>(0.1, 0.13)***  | 0.89<br>(0.86, 0.92)*** | 1.09<br>(1.07, 1.11)*** | 0.91<br>(0.89, 0.93)*** | 0.11<br>(0.1, 0.13)***  | 2.29<br>(2.22, 2.37)*** |
|                  | 6          | 0.88<br>(0.84, 0.93)*** | 0.16<br>(0.15, 0.17)*** | 0.71<br>(0.09, 5.47)    | 0.82<br>(0.74, 0.91)*** | 1.09<br>(1.02, 1.15)**  | 0.79<br>(0.74, 0.85)*** | 0.11<br>(0.07, 0.18)*** | 3.35<br>(3.01, 3.73)*** |
|                  | 7          | 1.01<br>(0.06, 16.21)   | 2724.73<br>(0, Inf)     | 1.01<br>(0, Inf)        | 0.96<br>(0, Inf)        | 0.97<br>(0, Inf)        | 13389.32<br>(0, Inf)    | 3.46<br>(0, Inf)        | 6203.43<br>(0, Inf)     |
|                  | 8          | 0.92<br>(0.91, 0.94)*** | 1.18<br>(1.16, 1.2)***  | 0.11<br>(0.1, 0.12)***  | 0.91<br>(0.88, 0.94)*** | 1.1<br>(1.08, 1.12)***  | 0.9<br>(0.88, 0.92)***  | 0.64<br>(0.56, 0.72)*** | 1.37<br>(1.32, 1.41)*** |
|                  | 9          | 0.98<br>(0.98, 0.99)*** | 0.84<br>(0.84, 0.85)*** | 0.8<br>(0.77, 0.84)***  | 0.92<br>(0.91, 0.93)*** | 1.05<br>(1.04, 1.06)*** | 0.86<br>(0.86, 0.87)*** | 0.59<br>(0.56, 0.61)*** | 1.3<br>(1.29, 1.32)***  |
|                  | 10         | 1.1<br>(0.42, 2.85)     | 0.4<br>(0.14, 1.16)*    | 0.71<br>(0.08, 6.52)    | 2.26<br>(0.37, 13.6)    | 1.29<br>(0.33, 4.99)    | 0.72<br>(0.16, 3.23)    | 0<br>(0, Inf)           | 0.3<br>(0.09, 1.03)*    |
|                  | 11         | 0.74<br>(0.7, 0.77)***  | 0.09<br>(0.09, 0.1)***  | 0<br>(0, Inf)           | 0.88<br>(0.79, 0.98)**  | 1.03<br>(0.97, 1.1)     | 0.81<br>(0.76, 0.87)*** | 0.89<br>(0.57, 1.4)     | 1.34<br>(1.2, 1.49)***  |
|                  | 12         | 0.97<br>(0.95, 0.98)*** | 0.06<br>(0.06, 0.07)*** | 0<br>(0, Inf)           | 0.91<br>(0.88, 0.95)*** | 0.99<br>(0.97, 1.01)    | 0.79<br>(0.77, 0.81)*** | 0.62<br>(0.51, 0.74)*** | 1.31<br>(1.26, 1.36)*** |
|                  | 13         | 3.3<br>(0.91, 11.98)*   | 0.6<br>(0.17, 2.07)     | NA<br>(NA, NA)          | 0.88<br>(0.1, 7.95)     | 0.4<br>(0.09, 1.8)      | 0.64<br>(0.16, 2.63)    | 0<br>(0, Inf)           | 0.28<br>(0.07, 1.14)*   |
|                  | 14         | NA<br>(NA, NA)          | NA<br>(NA, NA)          | NA<br>(NA, NA)          | NA<br>(NA, NA)          | NA<br>(NA, NA)          | NA<br>(NA, NA)          | NA<br>(NA, NA)          | NA<br>(NA, NA)          |
| Northern Ireland | 1          | 0.88<br>(0.86, 0.9)***  | 0.99<br>(0.97, 1.02)    | 0.25<br>(0.25, 0.26)*** | 0.89<br>(0.84, 0.94)*** | 1.1<br>(1.06, 1.13)***  | 1.03<br>(1, 1.07)**     | 0.81<br>(0.78, 0.84)*** | 1.35<br>(1.32, 1.38)*** |
|                  | 2          | 0.87<br>(0.86, 0.88)*** | 0.45<br>(0.44, 0.45)*** | 0<br>(0, 0)***          | 0.8<br>(0.77, 0.83)***  | 1.17<br>(1.14, 1.19)*** | 1.1<br>(1.08, 1.13)***  | 0.24<br>(0.23, 0.25)*** | 2.33<br>(2.29, 2.37)*** |
|                  | 3          | 0<br>(0, Inf)           | 0.6<br>(0, Inf)         | 2348.43<br>(0, Inf)     | 0.99<br>(0, Inf)        | 1.05<br>(0, Inf)        | 23616.48<br>(0, Inf)    | 2.76<br>(0, Inf)        | 18393.09<br>(0, Inf)    |
|                  | 4          | 1.02<br>(1, 1.04)**     | 1.25<br>(1.22, 1.28)*** | 2.11<br>(2.05, 2.17)*** | 1.02<br>(0.97, 1.06)    | 0.98<br>(0.96, 1)       | 1.01<br>(0.98, 1.03)    | 1.07<br>(1.04, 1.1)***  | 0.88<br>(0.87, 0.9)***  |
|                  | 5          | 0.9<br>(0.86, 0.95)***  | 0.62<br>(0.59, 0.65)*** | 0<br>(0, 0.01)***       | 0.81<br>(0.7, 0.94)***  | 1.19<br>(1.11, 1.28)*** | 1.14<br>(1.06, 1.22)*** | 0.18<br>(0.14, 0.21)*** | 2.49<br>(2.33, 2.66)*** |
|                  | 6          | 0.67<br>(0.57, 0.78)*** | 0.06<br>(0.04, 0.08)*** | 0<br>(0, Inf)           | 0.48<br>(0.29, 0.8)**   | 1.26<br>(1.01, 1.58)**  | 1.31<br>(1.05, 1.63)**  | 0.05<br>(0.02, 0.15)*** | 4.22<br>(3.38, 5.26)*** |
|                  | 7          | NA<br>(NA, NA)          | NA<br>(NA, NA)          | NA<br>(NA, NA)          | NA<br>(NA, NA)          | NA<br>(NA, NA)          | NA<br>(NA, NA)          | NA<br>(NA, NA)          | NA<br>(NA, NA)          |
|                  | 8          | 0.83<br>(0.79, 0.87)*** | 1.19<br>(1.13, 1.26)*** | 0.18<br>(0.06, 0.56)*** | 0.79<br>(0.68, 0.91)*** | 1.13<br>(1.05, 1.21)*** | 1.08<br>(1.01, 1.16)**  | 0.67<br>(0.56, 0.81)*** | 1.59<br>(1.49, 1.7)***  |
|                  | 9          | 0.9<br>(0.88, 0.92)***  | 0.3<br>(0.29, 0.31)***  | 1.36<br>(0.96, 1.92)*   | 0.87<br>(0.82, 0.92)*** | 1.11<br>(1.07, 1.14)*** | 0.97<br>(0.94, 1.01)    | 0.57<br>(0.53, 0.61)*** | 1.5<br>(1.46, 1.54)***  |
|                  | 10         | NA<br>(NA, NA)          | NA<br>(NA, NA)          | NA<br>(NA, NA)          | NA<br>(NA, NA)          | NA<br>(NA, NA)          | NA<br>(NA, NA)          | NA<br>(NA, NA)          | NA<br>(NA, NA)          |
|                  | 11         | 0.57<br>(0.49, 0.67)*** | 0.15<br>(0.11, 0.2)***  | 0<br>(0, Inf)           | 0.58<br>(0.35, 0.97)**  | 0.93<br>(0.75, 1.17)    | 1.05<br>(0.85, 1.31)    | 0.32<br>(0.1, 1.02)*    | 1.61<br>(1.3, 2.01)***  |
|                  | 12         | 0.95<br>(0.88, 1.02)    | 0.16<br>(0.14, 0.18)*** | 0<br>(0, Inf)           | 1.03<br>(0.84, 1.25)    | 0.99<br>(0.89, 1.11)    | 0.89<br>(0.8, 0.99)**   | 0.62<br>(0.44, 0.88)**  | 1.37<br>(1.24, 1.52)*** |
|                  | 13         | NA<br>(NA, NA)          | NA<br>(NA, NA)          | NA<br>(NA, NA)          | NA<br>(NA, NA)          | NA<br>(NA, NA)          | NA<br>(NA, NA)          | NA<br>(NA, NA)          | NA<br>(NA, NA)          |
|                  | 14         | NA<br>(NA, NA)          | NA<br>(NA, NA)          | NA<br>(NA, NA)          | NA<br>(NA, NA)          | NA<br>(NA, NA)          | NA<br>(NA, NA)          | NA<br>(NA, NA)          | NA<br>(NA, NA)          |
| Scotland         | 1          | 0.93<br>(0.91, 0.95)*** | 0.84<br>(0.82, 0.86)*** | 0.25<br>(0.24, 0.26)*** | 1<br>(0.96, 1.03)       | 1<br>(0.97, 1.03)       | 0.87<br>(0.85, 0.89)*** | 0.86<br>(0.81, 0.92)*** | 1.08<br>(1.03, 1.12)*** |
|                  | 2          | 0.94<br>(0.93, 0.95)*** | 0.77<br>(0.77, 0.78)*** | 0.17<br>(0.17, 0.17)*** | 0.97<br>(0.96, 0.99)*** | 1.07<br>(1.06, 1.08)*** | 0.85<br>(0.84, 0.85)*** | 0.29<br>(0.27, 0.3)***  | 1.58<br>(1.55, 1.61)*** |
|                  | 3          | 1.79<br>(0.61, 5.24)    | 0.59<br>(0.19, 1.83)    | 0.18<br>(0.03, 1.15)*   | 0.45<br>(0.05, 3.89)    | 0.74<br>(0.21, 2.55)    | 0.54<br>(0.14, 2.03)    | 0.63<br>(0.06, 7.16)    | 0.54<br>(0.12, 2.5)     |
|                  | 4          | 1.02<br>(1.01, 1.04)*** | 1.82<br>(1.78, 1.86)*** | 1.82<br>(1.77, 1.88)*** | 1.01<br>(0.98, 1.04)    | 0.99<br>(0.96, 1.01)    | 1.03<br>(1.01, 1.06)**  | 1.02<br>(0.96, 1.08)    | 0.81<br>(0.78, 0.84)*** |
|                  | 5          | 0.93<br>(0.9, 0.96)***  | 0.71<br>(0.68, 0.73)*** | 0.01<br>(0.01, 0.02)*** | 0.97<br>(0.92, 1.03)    | 1.09<br>(1.05, 1.14)*** | 0.91<br>(0.87, 0.95)*** | 0.25<br>(0.18, 0.35)*** | 3.02<br>(2.69, 3.41)*** |
|                  | 6          | 0.84<br>(0.74, 0.96)**  | 0.08<br>(0.06, 0.1)***  | NA<br>(NA, NA)          | 1.11<br>(0.89, 1.37)    | 1.13<br>(0.96, 1.34)    | 0.77<br>(0.64, 0.94)**  | 0.34<br>(0.07, 1.56)    | 6.59<br>(3.53, 12.3)*** |
|                  | 7          | 3749.63<br>(0, Inf)     | 1.33<br>(0, Inf)        | 6312.12<br>(0, Inf)     | 1906506.46<br>(0, Inf)  | 0.96<br>(0, Inf)        | 1.17<br>(0, Inf)        | 0<br>(0, Inf)           | 0.87<br>(0, Inf)        |
|                  | 8          | 0.86<br>(0.84, 0.89)*** | 0.63<br>(0.61, 0.65)*** | 0.01<br>(0, 0.01)***    | 0.96<br>(0.9, 1.02)     | 1.08<br>(1.04, 1.13)*** | 0.95<br>(0.9, 0.99)**   | 0.88<br>(0.63, 1.24)    | 3.48<br>(3.09, 3.92)*** |
|                  | 9          | 0.97                    | 1.1                     | 0.47                    | 0.98                    | 1.05                    | 0.9                     | 0.79                    | 3.79                    |



Supplementary Table 3 Adjusted and Unadjusted hazard ratios from the multistate model for Wales

| Variable             | Type             | Transition | Adjusted Hazard Ratio | Unadjusted Hazard Ratio |
|----------------------|------------------|------------|-----------------------|-------------------------|
| sex                  | Male             | 2          | 0.93 (0.92, 0.94)     | 0.96 (0.95, 0.97)       |
|                      |                  | 9          | 0.97 (0.95, 0.98)     | 0.97 (0.96, 0.98)       |
|                      |                  | 12         | 1.02 (0.99, 1.05)     | 1.01 (0.98, 1.04)       |
| age category         | 12-15            | 2          | 0.46 (0.45, 0.46)     | 0.5 (0.5, 0.51)         |
|                      |                  | 9          | 0.96 (0.95, 0.97)     | 0.96 (0.94, 0.97)       |
|                      |                  | 12         | 0.14 (0.14, 0.15)     | 0.15 (0.15, 0.16)       |
|                      | 5-11             | 2          | 0.06 (0.06, 0.06)     | 0.07 (0.07, 0.07)       |
|                      |                  | 9          | 0.42 (0.38, 0.47)     | 0.35 (0.31, 0.4)        |
|                      |                  | 12         | NA                    | NA                      |
| household n          | 2                | 2          | 0.83 (0.81, 0.86)     | 0.87 (0.85, 0.9)        |
|                      |                  | 9          | 0.94 (0.91, 0.97)     | 0.95 (0.92, 0.98)       |
|                      |                  | 12         | 0.89 (0.83, 0.95)     | 0.93 (0.87, 1)          |
|                      | 4                | 2          | 1.14 (1.12, 1.16)     | 1.13 (1.12, 1.15)       |
|                      |                  | 9          | 1.05 (1.03, 1.07)     | 1.05 (1.03, 1.07)       |
|                      |                  | 12         | 0.97 (0.93, 1.01)     | 0.91 (0.88, 0.95)       |
|                      | 5                | 2          | 0.99 (0.98, 1.01)     | 0.89 (0.88, 0.9)        |
|                      |                  | 9          | 0.93 (0.91, 0.95)     | 0.89 (0.88, 0.91)       |
|                      |                  | 12         | 0.82 (0.79, 0.86)     | 0.75 (0.72, 0.78)       |
| vaccinated household | Unvaccinated     | 2          | 0.19 (0.18, 0.2)      | 0.18 (0.17, 0.19)       |
|                      |                  | 9          | 0.64 (0.6, 0.68)      | 0.66 (0.62, 0.7)        |
|                      |                  | 12         | 0.5 (0.41, 0.6)       | 0.59 (0.48, 0.71)       |
|                      | Fully vaccinated | 2          | 2.45 (2.41, 2.49)     | 2.14 (2.1, 2.18)        |
|                      |                  | 9          | 1.3 (1.28, 1.33)      | 1.34 (1.31, 1.37)       |
|                      |                  | 12         | 1.38 (1.31, 1.45)     | 1.34 (1.27, 1.4)        |

Supplementary Table 4 Results of the meta-analysis before removal of Northern Irelands 5-11 year olds. Please note the very large  $\tau^2$  resulting from small numbers in Northern Irelands 5-11-year-olds receiving their vaccine.

| Variable                                         | Type             | Transition   | aHR  | 95% CI lower | 95% CI upper | Between study variance ( $\tau^2$ ) |
|--------------------------------------------------|------------------|--------------|------|--------------|--------------|-------------------------------------|
| <b>Age</b>                                       | 5-11             | 1st dose     | 0.03 | 0.00         | 0.31         | 5.00                                |
|                                                  |                  | 2nd dose     | 0.67 | 0.40         | 1.12         | 0.26                                |
|                                                  | 12-15            | 1st dose     | 0.58 | 0.43         | 0.77         | 0.09                                |
|                                                  |                  | 2nd dose     | 0.72 | 0.40         | 1.28         | 0.35                                |
|                                                  |                  | Booster dose | 0.10 | 0.06         | 0.16         | 0.23                                |
|                                                  |                  | 1st dose     | 0.93 | 0.89         | 0.97         | 0.00                                |
| <b>Sex</b> Male                                  | 2nd dose         | 0.95         | 0.92 | 0.99         | 0.00         |                                     |
|                                                  | Booster dose     | 0.97         | 0.93 | 1.01         | 0.00         |                                     |
|                                                  | 1st dose         | 0.87         | 0.80 | 0.94         | 0.01         |                                     |
| <b>Number of residents in household</b>          | 2                | 2nd dose     | 0.93 | 0.89         | 0.97         | 0.00                                |
|                                                  |                  | Booster dose | 0.95 | 0.88         | 1.02         | 0.00                                |
|                                                  |                  | 1st dose     | 1.12 | 1.08         | 1.16         | 0.00                                |
|                                                  | 4                | 2nd dose     | 1.06 | 1.04         | 1.08         | 0.00                                |
|                                                  |                  | Booster dose | 0.99 | 0.97         | 1.01         | 0.00                                |
|                                                  |                  | 1st dose     | 0.95 | 0.85         | 1.07         | 0.01                                |
|                                                  | 5+               | 2nd dose     | 0.92 | 0.87         | 0.96         | 0.00                                |
|                                                  |                  | Booster dose | 0.80 | 0.77         | 0.84         | 0.00                                |
|                                                  |                  | 1st dose     | 0.19 | 0.13         | 0.29         | 0.18                                |
| <b>Vaccination status of adults in household</b> | Unvaccinated     | 2nd dose     | 0.64 | 0.56         | 0.73         | 0.02                                |
|                                                  |                  | Booster dose | 0.60 | 0.50         | 0.73         | 0.02                                |
|                                                  |                  | 1st dose     | 2.25 | 1.76         | 2.87         | 0.06                                |
|                                                  | Fully vaccinated | 2nd dose     | 1.76 | 1.06         | 2.92         | 0.26                                |
|                                                  |                  | Booster dose | 1.43 | 1.27         | 1.61         | 0.01                                |
|                                                  |                  | 1st dose     |      |              |              |                                     |

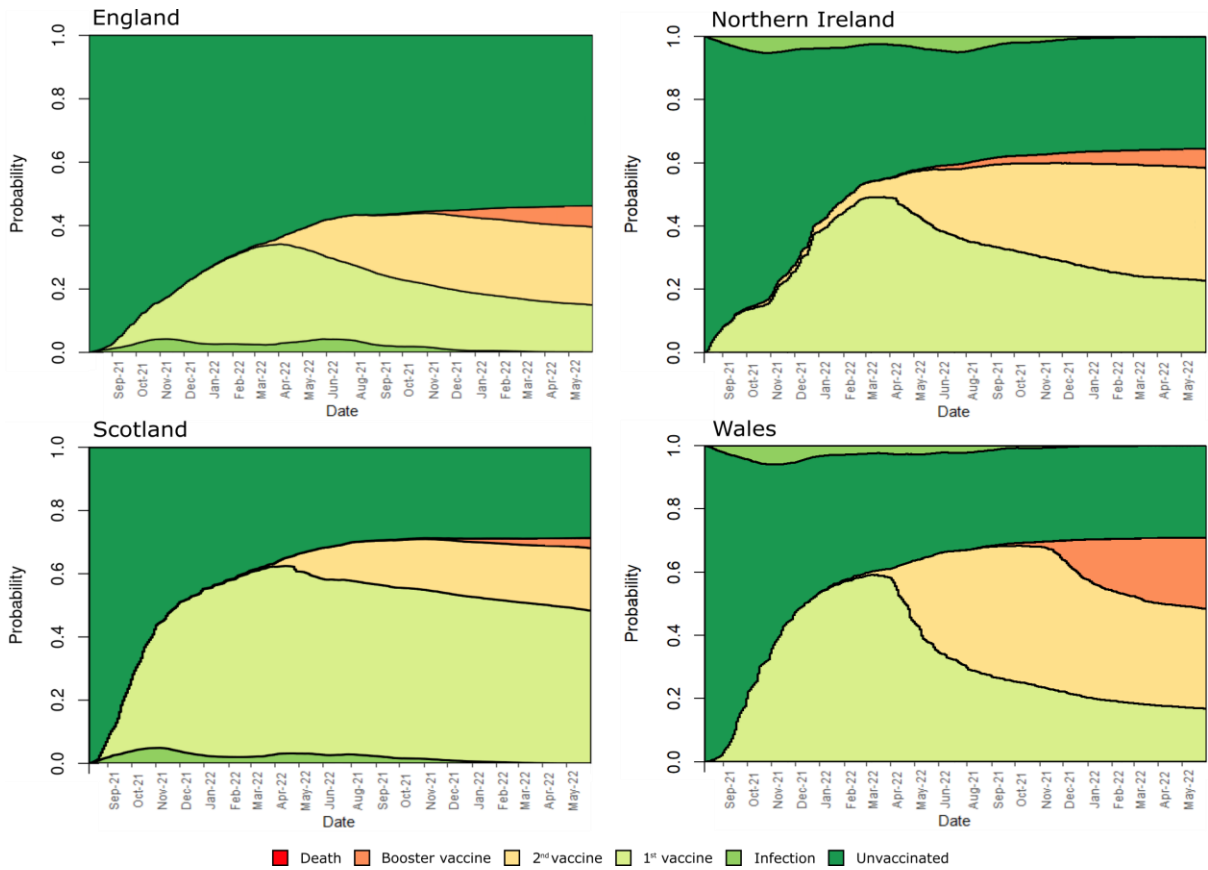

Supplementary Figure 3 Cumulative probability plots representing the different states of the mode, and the probability that an individual will occupy each state throughout the study period.



## Sensitivity analysis

We conducted a sensitivity analysis to investigate the effect of expanding the study period until the end of 2022 (31<sup>st</sup> Dec), and to account for additional covariates.

England were unable to contribute data for the additional covariates and extended study period. Northern Ireland were unable to provide ethnicity data due to small numbers.

Supplementary Table 5 Adjusted hazard ratio and 95% confidence intervals resulting from the multistate model vaccination transitions for Northern Ireland, Scotland and Wales with a study end date of 31st May 2022. Northern Ireland did not provide results for the ethnicity. The reference for each group is aged 16-17, female, a household occupancy of three, a partially vaccinated household, urban, IMD 2019 quintile of three and white. Asterisk indicates significance of two tailed P values, \*\*P<0.05, \*\*\*P<0.01.

| Country          | Vaccine  | Sex                           | Age group                     |                               |                                 | Household n =                 |                                 |                               | Household vaccination status  |  |
|------------------|----------|-------------------------------|-------------------------------|-------------------------------|---------------------------------|-------------------------------|---------------------------------|-------------------------------|-------------------------------|--|
|                  |          | Male                          | 12-15                         | 5-11                          | 2                               | 4                             | 5+                              | Unvaccinated                  | Fully vaccinated              |  |
| Wales            | 1st dose | 0.93 (0.92, 0.94) (P = 0 ***) | 0.44 (0.44, 0.45) (P = 0 ***) | 0.06 (0.06, 0.06) (P = 0 ***) | 0.86 (0.83, 0.88) (P = 0 ***)   | 1.12 (1.11, 1.14) (P = 0 ***) | 1.01 (1, 1.03) (P = 0.1)        | 0.2 (0.19, 0.21) (P = 0 ***)  | 2.43 (2.39, 2.47) (P = 0 ***) |  |
|                  | 2nd dose | 0.97 (0.95, 0.98) (P = 0 ***) | 0.94 (0.93, 0.95) (P = 0 ***) | 0.45 (0.45, 0.46) (P = 0 ***) | 0.96 (0.93, 0.99) (P = 0.01 **) | 1.04 (1.03, 1.06) (P = 0 ***) | 0.93 (0.91, 0.94) (P = 0 ***)   | 0.66 (0.62, 0.7) (P = 0 ***)  | 1.28 (1.26, 1.31) (P = 0 ***) |  |
|                  | 3rd dose | 0.98 (0.96, 1) (P = 0.1)      | 0.17 (0.16, 0.17) (P = 0 ***) | 0 (0, 0.01) (P = 0 ***)       | 0.97 (0.86, 0.97) (P = 0 ***)   | 1) (P = 0.04 **)              | 0.83 (0.8, 0.86) (P = 0 ***)    | 0.51 (0.43, 0.6) (P = 0 ***)  | 1.34 (1.28, 1.39) (P = 0 ***) |  |
| Scotland         | 1st dose | 0.94 (0.93, 0.94) (P = 0 ***) | 0.57 (0.57, 0.58) (P = 0 ***) | 0.12 (0.12, 0.12) (P = 0 ***) | 1 (0.99, 1.02) (P = 0.65)       | 1.03 (1.02, 1.04) (P = 0 ***) | 0.84 (0.83, 0.85) (P = 0 ***)   | 0.31 (0.29, 0.32) (P = 0 ***) | 1.44 (1.42, 1.47) (P = 0 ***) |  |
|                  | 2nd dose | 0.97 (0.96, 0.98) (P = 0 ***) | 0.9 (0.88, 0.91) (P = 0 ***)  | 0.41 (0.39, 0.44) (P = 0 ***) | 0.99 (0.97, 1.01) (P = 0.15)    | 1.03 (1.02, 1.05) (P = 0 ***) | 0.93 (0.92, 0.95) (P = 0 ***)   | 0.81 (0.73, 0.9) (P = 0 ***)  | 4.6 (4.45, 4.76) (P = 0 ***)  |  |
|                  | 3rd dose | 0.89 (0.85, 0.93) (P = 0 ***) | 0.07 (0.06, 0.07) (P = 0 ***) | NA (NA, NA) (P = NA)          | 1.06 (0.99, 1.14) (P = 0.1)     | 0.99 (0.94, 1.05) (P = 0.85)  | 0.78 (0.73, 0.83) (P = 0 ***)   | 0.68 (0.17, 2.76) (P = 0.59)  | 1.52 (1.3, 1.79) (P = 0 ***)  |  |
| Northern Ireland | 1st dose | 0.88 (0.87, 0.89) (P = 0 ***) | 0.44 (0.43, 0.44) (P = 0 ***) |                               | 0.82 (0.79, 0.85) (P = 0 ***)   | 1.14 (1.12, 1.17) (P = 0 ***) | 1.1 (1.08, 1.12) (P = 0 ***)    | 0.24 (0.23, 0.25) (P = 0 ***) | 2.27 (2.23, 2.31) (P = 0 ***) |  |
|                  | 2nd dose | 0.92 (0.91, 0.94) (P = 0 ***) | 0.39 (0.38, 0.4) (P = 0 ***)  |                               | 0.93 (0.88, 0.98) (P = 0.01 **) | 1.05 (1.02, 1.09) (P = 0 ***) | 0.97 (0.94, 0.99) (P = 0.01 **) | 0.59 (0.55, 0.64) (P = 0 ***) | 1.38 (1.35, 1.42) (P = 0 ***) |  |
|                  | 3rd dose | 1.01 (0.96, 1.06) (P = 0.81)  | 0.48 (0.45, 0.51) (P = 0 ***) |                               | 0.98 (0.86, 1.13) (P = 0.83)    | 1 (0.93, 1.08) (P = 0.98)     | 0.95 (0.88, 1.02) (P = 0.17)    | 0.54 (0.4, 0.71) (P = 0 ***)  | 1.32 (1.23, 1.42) (P = 0 ***) |  |

| Country          | Vaccine  | Urbanicity                      | IMD 2019 quintile               |                                 |                                 |                               | Ethnicity                       |                               |                               |                                 |                                |
|------------------|----------|---------------------------------|---------------------------------|---------------------------------|---------------------------------|-------------------------------|---------------------------------|-------------------------------|-------------------------------|---------------------------------|--------------------------------|
|                  |          | Rural                           | 1 Most                          | 2                               | 4                               | 5 Least                       | Asian                           | Mixed                         | Other                         | Black                           | Unknown                        |
| Wales            | 1st dose | 0.96 (0.95, 0.97) (P = 0 ***)   | 0.83 (0.81, 0.84) (P = 0 ***)   | 0.95 (0.94, 0.97) (P = 0 ***)   | 1.09 (1.07, 1.11) (P = 0 ***)   | 1.28 (1.26, 1.31) (P = 0 ***) | 1.3 (1.26, 1.33) (P = 0 ***)    | 0.88 (0.85, 0.91) (P = 0 ***) | 0.91 (0.86, 0.96) (P = 0 ***) | 0.83 (0.78, 0.88) (P = 0 ***)   | 0.35 (0.31, 0.4) (P = 0 ***)   |
|                  | 2nd dose | 0.93 (0.91, 0.94) (P = 0 ***)   | 0.91 (0.9, 0.93) (P = 0 ***)    | 1 (0.98, 1.02) (P = 0.85)       | 1.05 (1.03, 1.07) (P = 0 ***)   | 1.17 (1.14, 1.19) (P = 0 ***) | 1.16 (1.12, 1.19) (P = 0 ***)   | 1 (0.96, 1.04) (P = 0.89)     | 1.03 (0.97, 1.09) (P = 0.4)   | 0.96 (0.89, 1.03) (P = 0.22)    | 0.77 (0.66, 0.91) (P = 0 ***)  |
|                  | 3rd dose | 0.85 (0.83, 0.88) (P = 0 ***)   | 0.88 (0.84, 0.91) (P = 0 ***)   | 0.95 (0.91, 0.99) (P = 0.01 **) | 1.01 (0.97, 1.06) (P = 0.48)    | 1.23 (1.18, 1.27) (P = 0 ***) | 1.04 (0.98, 1.11) (P = 0.19)    | 1.02 (0.93, 1.11) (P = 0.69)  | 0.81 (0.71, 0.93) (P = 0 ***) | 0.75 (0.62, 0.89) (P = 0 ***)   | 1.3 (0.89, 1.92) (P = 0.18)    |
| Scotland         | 1st dose | 0.97 (0.96, 0.98) (P = 0 ***)   | 0.74 (0.72, 0.75) (P = 0 ***)   | 0.86 (0.85, 0.87) (P = 0 ***)   | 1.11 (1.09, 1.12) (P = 0 ***)   | 1.29 (1.27, 1.3) (P = 0 ***)  | 1.27 (1.25, 1.3) (P = 0 ***)    | 0.9 (0.87, 0.93) (P = 0 ***)  | 0.9 (0.85, 0.95) (P = 0 ***)  | 0.83 (0.79, 0.86) (P = 0 ***)   | 0.93 (0.93, 0.94) (P = 0 ***)  |
|                  | 2nd dose | 0.97 (0.96, 0.99) (P = 0 ***)   | 0.85 (0.84, 0.87) (P = 0 ***)   | 0.91 (0.89, 0.93) (P = 0 ***)   | 1.09 (1.07, 1.11) (P = 0 ***)   | 1.19 (1.17, 1.21) (P = 0 ***) | 0.99 (0.96, 1.02) (P = 0.39)    | 0.89 (0.84, 0.93) (P = 0 ***) | 0.81 (0.75, 0.88) (P = 0 ***) | 0.82 (0.77, 0.88) (P = 0 ***)   | 1.02 (1.01, 1.03) (P = 0 ***)  |
|                  | 3rd dose | 1.01 (0.95, 1.06) (P = 0.82)    | 0.78 (0.72, 0.85) (P = 0 ***)   | 0.85 (0.79, 0.92) (P = 0 ***)   | 1.14 (1.07, 1.22) (P = 0 ***)   | 1.28 (1.2, 1.36) (P = 0 ***)  | 0.85 (0.74, 0.97) (P = 0.01 **) | 1 (0.82, 1.22) (P = 0.97)     | 0.83 (0.58, 1.2) (P = 0.32)   | 0.61 (0.41, 0.91) (P = 0.02 **) | 0.96 (0.91, 1.01) (P = 0.09 *) |
| Northern Ireland | 1st dose | 1.02 (1.01, 1.04) (P = 0.01 **) | 0.78 (0.76, 0.8) (P = 0 ***)    | 0.94 (0.92, 0.96) (P = 0 ***)   | 1.11 (1.09, 1.14) (P = 0 ***)   | 1.35 (1.32, 1.38) (P = 0 ***) |                                 |                               |                               |                                 |                                |
|                  | 2nd dose | 0.98 (0.96, 1) (P = 0.02 **)    | 0.84 (0.82, 0.87) (P = 0 ***)   | 0.93 (0.9, 0.96) (P = 0 ***)    | 1.14 (1.11, 1.17) (P = 0 ***)   | 1.32 (1.28, 1.36) (P = 0 ***) |                                 |                               |                               |                                 |                                |
|                  | 3rd dose | 0.97 (0.92, 1.03) (P = 0.35)    | 0.89 (0.81, 0.98) (P = 0.02 **) | 1.04 (0.96, 1.13) (P = 0.33)    | 1.09 (1.02, 1.18) (P = 0.02 **) | 1.14 (1.06, 1.23) (P = 0 ***) |                                 |                               |                               |                                 |                                |

Supplementary Table 6 Adjusted hazard ratio and 95% confidence intervals resulting from the multistate model vaccination transitions for Northern Ireland, Scotland and Wales with a study end date of 31st December 2022. Northern Ireland did not provide results for the ethnicity. The reference for each group is aged 16-17, female, a household occupancy of three, a partially vaccinated household, urban, IMD 2019 quintile of three and white. Asterisk indicates significance of two tailed P values, \*\*P<0.05, \*\*\*P<0.01.

| Country          | Vaccine  | Sex                           | Age group                     |                               |                                 | Household n =                 |                               |                                 | Household vaccination status  |  |
|------------------|----------|-------------------------------|-------------------------------|-------------------------------|---------------------------------|-------------------------------|-------------------------------|---------------------------------|-------------------------------|--|
|                  |          | Male                          | 12-15                         | 5-11                          | 2                               | 4                             | 5+                            | Unvaccinated                    | Fully vaccinated              |  |
| Wales            | 1st dose | 0.93 (0.92, 0.94) (P = 0 ***) | 0.44 (0.44, 0.45) (P = 0 ***) | 0.06 (0.06, 0.06) (P = 0 ***) | 0.86 (0.83, 0.88) (P = 0 ***)   | 1.12 (1.11, 1.14) (P = 0 ***) | 1.01 (1.03, 0.1)              | 0.2 (0.19, 0.21) (P = 0 ***)    | 2.43 (2.39, 2.47) (P = 0 ***) |  |
|                  | 2nd dose | 0.97 (0.95, 0.98) (P = 0 ***) | 0.94 (0.93, 0.95) (P = 0 ***) | 0.45 (0.45, 0.46) (P = 0 ***) | 0.96 (0.93, 0.99) (P = 0.01 **) | 1.04 (1.03, 1.06) (P = 0 ***) | 0.93 (0.91, 0.94) (P = 0 ***) | 0.66 (0.62, 0.7) (P = 0 ***)    | 1.28 (1.26, 1.31) (P = 0 ***) |  |
|                  | 3rd dose | 0.98 (0.96, 1) (P = 0.1)      | 0.17 (0.16, 0.17) (P = 0 ***) | 0 (0, 0.01) (P = 0 ***)       | 0.92 (0.86, 0.97) (P = 0 ***)   | 0.97 (0.94, 0.04 **)          | 0.83 (0.8, 0.86) (P = 0 ***)  | 0.51 (0.43, 0.6) (P = 0 ***)    | 1.34 (1.28, 1.39) (P = 0 ***) |  |
| Scotland         | 1st dose | 0.94 (0.93, 0.95) (P = 0 ***) | 0.54 (0.54, 0.55) (P = 0 ***) | 0.12 (0.12, 0.12) (P = 0 ***) | 1 (0.98, 1.01) (P = 0.52)       | 1.04 (1.03, 1.05) (P = 0 ***) | 0.84 (0.83, 0.85) (P = 0 ***) | 0.34 (0.32, 0.35) (P = 0 ***)   | 1.47 (1.45, 1.5) (P = 0 ***)  |  |
|                  | 2nd dose | 0.97 (0.96, 0.98) (P = 0 ***) | 0.82 (0.81, 0.83) (P = 0 ***) | 0.46 (0.45, 0.46) (P = 0 ***) | 0.98 (0.96, 1) (P = 0.02 **)    | 1.03 (1.02, 1.04) (P = 0 ***) | 0.94 (0.92, 0.95) (P = 0 ***) | 0.91 (0.84, 0.98) (P = 0.02 **) | 4 (3.89, 4.12) (P = 0 ***)    |  |
|                  | 3rd dose | 0.91 (0.88, 0.94) (P = 0 ***) | 0.13 (0.12, 0.13) (P = 0 ***) | 0 (0, 0) (P = 0 ***)          | 1.04 (0.99, 1.1) (P = 0.14)     | 0.98 (0.94, 1.02) (P = 0.32)  | 0.81 (0.78, 0.85) (P = 0 ***) | 0.26 (0.1, 0.7) (P = 0.01 **)   | 1.51 (1.35, 1.69) (P = 0 ***) |  |
| Northern Ireland | 1st dose | 0.88 (0.87, 0.89) (P = 0 ***) | 0.43 (0.43, 0.44) (P = 0 ***) | 0.02 (0.02, 0.02) (P = 0 ***) | 0.82 (0.79, 0.85) (P = 0 ***)   | 1.15 (1.12, 1.17) (P = 0 ***) | 1.11 (1.09, 1.13) (P = 0 ***) | 0.24 (0.23, 0.25) (P = 0 ***)   | 2.28 (2.24, 2.33) (P = 0 ***) |  |
|                  | 2nd dose | 0.92 (0.91, 0.94) (P = 0 ***) | 0.45 (0.45, 0.46) (P = 0 ***) | 0.6 (0.58, 0.61) (P = 0 ***)  | 0.92 (0.88, 0.97) (P = 0 ***)   | 1.06 (1.03, 1.08) (P = 0 ***) | 0.97 (0.94, 0.01 **)          | 0.62 (0.59, 0.67) (P = 0 ***)   | 1.36 (1.33, 1.39) (P = 0 ***) |  |
|                  | 3rd dose | 0.98 (0.94, 1.02) (P = 0.3)   | 0.36 (0.35, 0.38) (P = 0 ***) | 0.21 (0.19, 0.23) (P = 0 ***) | 0.96 (0.86, 1.07) (P = 0.49)    | 0.96 (0.91, 1.02) (P = 0.22)  | 0.91 (0.86, 0.97) (P = 0 ***) | 0.65 (0.53, 0.79) (P = 0 ***)   | 1.28 (1.21, 1.35) (P = 0 ***) |  |

| Country          | Vaccine  | Urbanicity                    | IMD 2019 quintile             |                                 |                               |                               | Ethnicity                       |                               |                               |                               |                                 |
|------------------|----------|-------------------------------|-------------------------------|---------------------------------|-------------------------------|-------------------------------|---------------------------------|-------------------------------|-------------------------------|-------------------------------|---------------------------------|
|                  |          | Rural                         | 1 Most                        | 2                               | 4                             | 5 Least                       | Asian                           | Mixed                         | Other                         | Black                         | Unknown                         |
| Wales            | 1st dose | 0.96 (0.95, 0.97) (P = 0 ***) | 0.83 (0.81, 0.84) (P = 0 ***) | 0.95 (0.94, 0.97) (P = 0 ***)   | 1.09 (1.07, 1.11) (P = 0 ***) | 1.28 (1.26, 1.31) (P = 0 ***) | 1.3 (1.26, 1.33) (P = 0 ***)    | 0.88 (0.85, 0.91) (P = 0 ***) | 0.91 (0.86, 0.96) (P = 0 ***) | 0.83 (0.78, 0.88) (P = 0 ***) | 0.35 (0.31, 0.4) (P = 0 ***)    |
|                  | 2nd dose | 0.93 (0.91, 0.94) (P = 0 ***) | 0.91 (0.9, 0.93) (P = 0 ***)  | 1 (0.98, 1.02) (P = 0.85)       | 1.05 (1.03, 1.07) (P = 0 ***) | 1.17 (1.14, 1.19) (P = 0 ***) | 1.16 (1.12, 1.19) (P = 0 ***)   | 1 (0.96, 1.04) (P = 0.89)     | 1.03 (0.97, 1.09) (P = 0.4)   | 0.96 (0.89, 1.03) (P = 0.22)  | 0.77 (0.66, 0.91) (P = 0 ***)   |
|                  | 3rd dose | 0.85 (0.83, 0.88) (P = 0 ***) | 0.88 (0.84, 0.91) (P = 0 ***) | 0.95 (0.91, 0.99) (P = 0.01 **) | 1.01 (0.97, 1.06) (P = 0.48)  | 1.23 (1.18, 1.27) (P = 0 ***) | 1.04 (0.98, 1.11) (P = 0.19)    | 1.02 (0.93, 1.11) (P = 0.69)  | 0.81 (0.71, 0.93) (P = 0 ***) | 0.75 (0.62, 0.89) (P = 0 ***) | 1.3 (0.89, 1.92) (P = 0.18)     |
| Scotland         | 1st dose | 0.99 (0.98, 1) (P = 0.14)     | 0.72 (0.71, 0.73) (P = 0 ***) | 0.85 (0.84, 0.86) (P = 0 ***)   | 1.12 (1.11, 1.13) (P = 0 ***) | 1.32 (1.31, 1.34) (P = 0 ***) | 1.32 (1.29, 1.34) (P = 0 ***)   | 0.93 (0.9, 0.96) (P = 0 ***)  | 0.89 (0.85, 0.93) (P = 0 ***) | 0.83 (0.8, 0.87) (P = 0 ***)  | 0.94 (0.93, 0.95) (P = 0 ***)   |
|                  | 2nd dose | 0.95 (0.94, 0.96) (P = 0 ***) | 0.84 (0.83, 0.85) (P = 0 ***) | 0.92 (0.91, 0.94) (P = 0 ***)   | 1.08 (1.07, 1.1) (P = 0 ***)  | 1.17 (1.15, 1.18) (P = 0 ***) | 1.03 (1.01, 1.06) (P = 0.01 **) | 0.92 (0.89, 0.96) (P = 0 ***) | 0.87 (0.82, 0.93) (P = 0 ***) | 0.86 (0.81, 0.91) (P = 0 ***) | 1.01 (1, 1.02) (P = 0.17)       |
|                  | 3rd dose | 0.81 (0.78, 0.85) (P = 0 ***) | 0.84 (0.79, 0.89) (P = 0 ***) | 0.88 (0.83, 0.93) (P = 0 ***)   | 1.09 (1.03, 1.14) (P = 0 ***) | 1.26 (1.2, 1.32) (P = 0 ***)  | 1 (0.92, 1.1) (P = 0.92)        | 0.93 (0.8, 1.09) (P = 0.37)   | 0.87 (0.67, 1.12) (P = 0.27)  | 0.7 (0.54, 0.9) (P = 0.01 **) | 0.95 (0.92, 0.99) (P = 0.01 **) |
| Northern Ireland | 1st dose | 1.01 (1, 1.03) (P = 0.14)     | 0.79 (0.77, 0.8) (P = 0 ***)  | 0.94 (0.92, 0.96) (P = 0 ***)   | 1.12 (1.09, 1.14) (P = 0 ***) | 1.36 (1.34, 1.39) (P = 0 ***) |                                 |                               |                               |                               |                                 |
|                  | 2nd dose | 0.96 (0.94, 0.98) (P = 0 ***) | 0.84 (0.82, 0.87) (P = 0 ***) | 0.92 (0.89, 0.94) (P = 0 ***)   | 1.15 (1.12, 1.17) (P = 0 ***) | 1.35 (1.31, 1.38) (P = 0 ***) |                                 |                               |                               |                               |                                 |
|                  | 3rd dose | 0.96 (0.92, 1) (P = 0.06)     | 0.97 (0.9, 1.05) (P = 0.46)   | 1.04 (0.97, 1.11) (P = 0.24)    | 1.14 (1.07, 1.21) (P = 0 ***) | 1.21 (1.14, 1.29) (P = 0 ***) |                                 |                               |                               |                               |                                 |

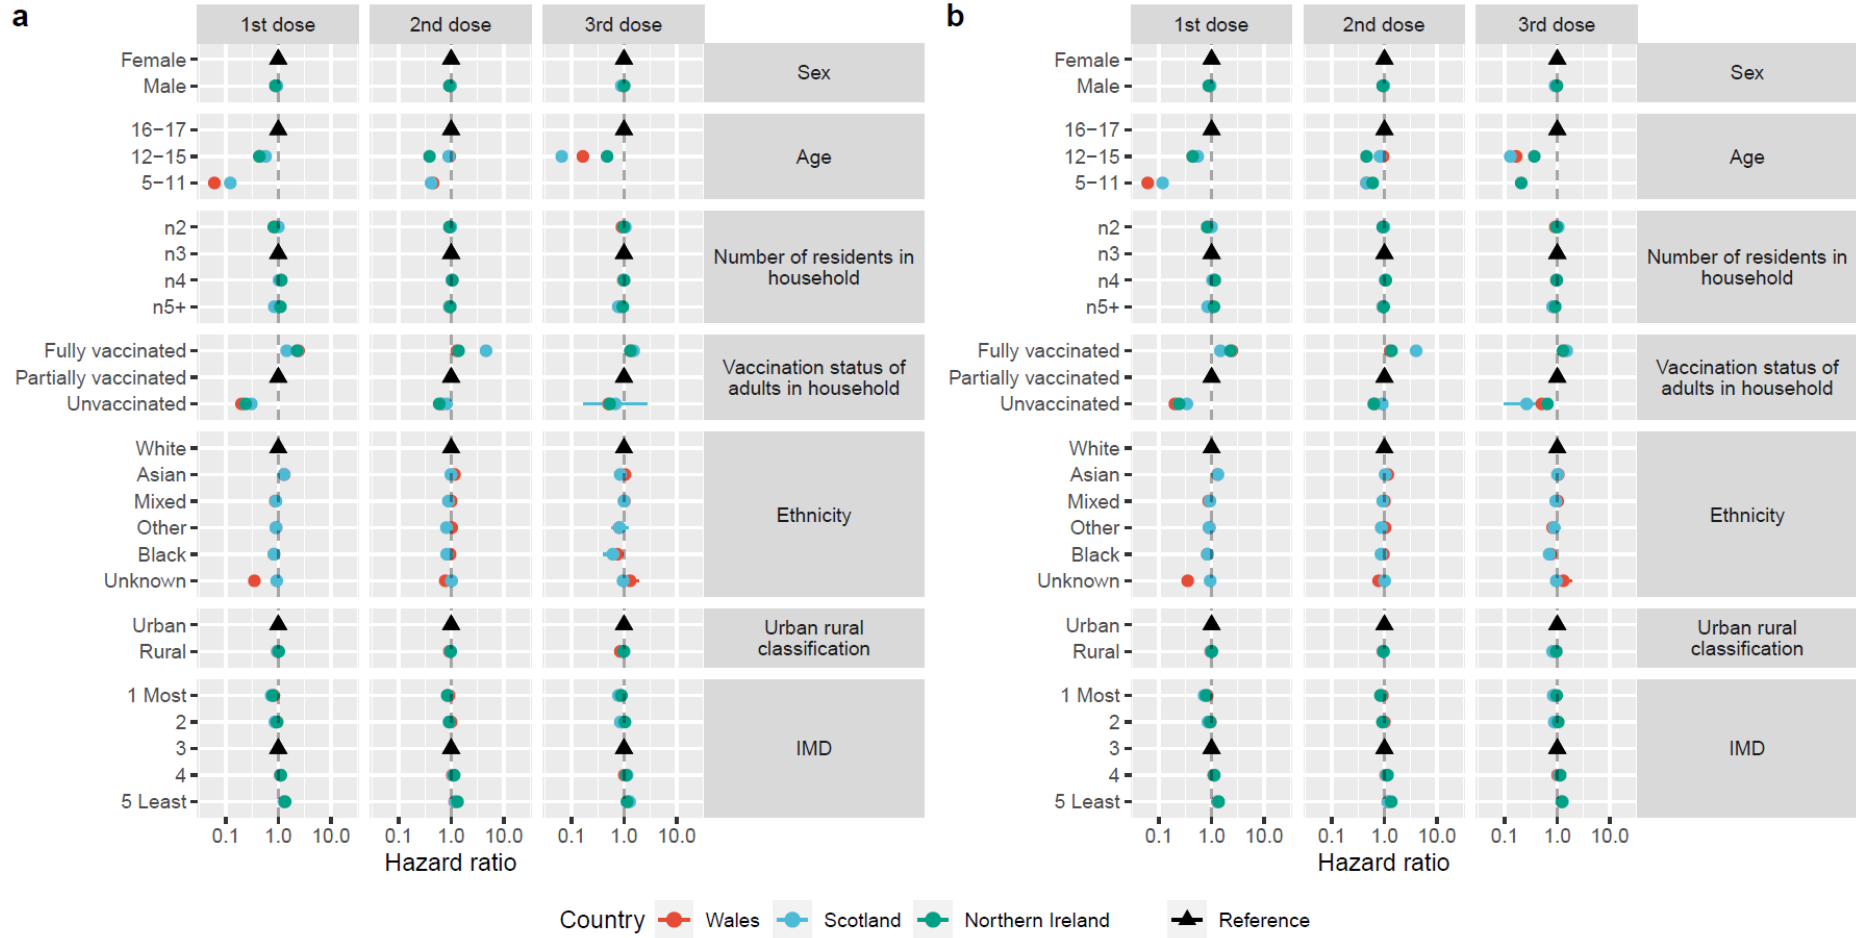

Supplementary Figure 4 Multistate modelling results, adjusted hazard ratio coefficient and 95% confidence intervals resulting from the multistate model for each transition for Northern Ireland, Scotland and Wales (Northern Ireland were not included in the ethnicity analysis) for the a. 4th August 2021 – 31st May 2022 study period and b. the 4th August – 31st December study period. The data used to generate these plots is available in tables 5 (plot a) and 6 (plot b).

Supplementary Table 7 Adjusted hazard ratio and 95% confidence intervals from the meta-analysis for study period ending 31st May 2022. This analysis includes Northern Ireland, Scotland and Wales. Ethnicity results are for Scotland and Wales only.

| Variable                                | Type                                             | Transition   | aHR      | 95% CI lower | 95% CI upper | Between study variance ( $\tau^2$ ) |      |
|-----------------------------------------|--------------------------------------------------|--------------|----------|--------------|--------------|-------------------------------------|------|
| <b>Age</b>                              | 5-11                                             | 1st dose     | 0.09     | 0.04         | 0.17         | 0.24                                |      |
|                                         |                                                  | 2nd dose     | 0.44     | 0.4          | 0.48         | 0                                   |      |
|                                         | 12-15                                            | 1st dose     | 0.48     | 0.4          | 0.57         | 0.02                                |      |
|                                         |                                                  | 2nd dose     | 0.69     | 0.39         | 1.21         | 0.25                                |      |
|                                         |                                                  | 3rd dose     | 0.17     | 0.06         | 0.53         | 0.99                                |      |
|                                         | <b>Sex</b>                                       | Male         | 1st dose | 0.92         | 0.88         | 0.95                                | 0    |
| 2nd dose                                |                                                  |              | 0.95     | 0.93         | 0.98         | 0                                   |      |
| 3rd dose                                |                                                  |              | 0.96     | 0.89         | 1.03         | 0                                   |      |
| <b>Number of residents in household</b> | n2                                               | 1st dose     | 0.89     | 0.79         | 1.01         | 0.01                                |      |
|                                         |                                                  | 2nd dose     | 0.96     | 0.93         | 0.99         | 0                                   |      |
|                                         |                                                  | 3rd dose     | 0.98     | 0.89         | 1.08         | 0.01                                |      |
|                                         | n4                                               | 1st dose     | 1.1      | 1.03         | 1.17         | 0                                   |      |
|                                         |                                                  | 2nd dose     | 1.04     | 1.03         | 1.05         | 0                                   |      |
|                                         |                                                  | 3rd dose     | 0.98     | 0.95         | 1            | 0                                   |      |
|                                         | n5+                                              | 1st dose     | 0.98     | 0.84         | 1.14         | 0.02                                |      |
|                                         |                                                  | 2nd dose     | 0.94     | 0.92         | 0.96         | 0                                   |      |
|                                         |                                                  | 3rd dose     | 0.85     | 0.76         | 0.95         | 0.01                                |      |
|                                         | <b>Vaccination status of adults in household</b> | Unvaccinated | 1st dose | 0.24         | 0.19         | 0.31                                | 0.05 |
|                                         |                                                  |              | 2nd dose | 0.68         | 0.57         | 0.81                                | 0.02 |
|                                         |                                                  |              | 3rd dose | 0.52         | 0.45         | 0.59                                | 0    |
| Fully vaccinated                        |                                                  | 1st dose     | 2        | 1.45         | 2.75         | 0.08                                |      |
|                                         |                                                  | 2nd dose     | 2.01     | 0.89         | 4.53         | 0.51                                |      |
|                                         |                                                  | 3rd dose     | 1.34     | 1.29         | 1.39         | 0                                   |      |
| <b>Urban - rural classification</b>     | Rural                                            | 1st dose     | 0.98     | 0.95         | 1.02         | 0                                   |      |
|                                         |                                                  | 2nd dose     | 0.96     | 0.93         | 0.99         | 0                                   |      |
|                                         |                                                  | 3rd dose     | 0.94     | 0.85         | 1.04         | 0.01                                |      |
| <b>IMD 2019 quintile</b>                | 1 Most                                           | 1st dose     | 0.78     | 0.73         | 0.83         | 0                                   |      |
|                                         |                                                  | 2nd dose     | 0.87     | 0.83         | 0.91         | 0                                   |      |
|                                         |                                                  | 3rd dose     | 0.85     | 0.79         | 0.92         | 0                                   |      |
|                                         | 2                                                | 1st dose     | 0.92     | 0.86         | 0.97         | 0                                   |      |
|                                         |                                                  | 2nd dose     | 0.94     | 0.89         | 1            | 0                                   |      |
|                                         |                                                  | 3rd dose     | 0.94     | 0.85         | 1.05         | 0.01                                |      |
|                                         | 4                                                | 1st dose     | 1.1      | 1.09         | 1.11         | 0                                   |      |
|                                         |                                                  | 2nd dose     | 1.09     | 1.04         | 1.14         | 0                                   |      |
|                                         |                                                  | 3rd dose     | 1.08     | 1            | 1.16         | 0                                   |      |
| 5 Least                                 | 1st dose                                         | 1.31         | 1.27     | 1.35         | 0            |                                     |      |
|                                         | 2nd dose                                         | 1.22         | 1.13     | 1.32         | 0            |                                     |      |
|                                         | 3rd dose                                         | 1.22         | 1.15     | 1.29         | 0            |                                     |      |
| <b>Ethnicity</b>                        | Asian                                            | 1st dose     | 1.28     | 1.26         | 1.3          | 0                                   |      |
|                                         |                                                  | 2nd dose     | 1.07     | 0.91         | 1.25         | 0.01                                |      |
|                                         |                                                  | 3rd dose     | 0.95     | 0.78         | 1.16         | 0.02                                |      |
|                                         | Mixed                                            | 1st dose     | 0.89     | 0.87         | 0.91         | 0                                   |      |
|                                         |                                                  | 2nd dose     | 0.94     | 0.83         | 1.07         | 0.01                                |      |
|                                         |                                                  | 3rd dose     | 1.01     | 0.94         | 1.1          | 0                                   |      |
|                                         | Other                                            | 1st dose     | 0.9      | 0.87         | 0.94         | 0                                   |      |
|                                         |                                                  | 2nd dose     | 0.91     | 0.73         | 1.15         | 0.03                                |      |
|                                         |                                                  | 3rd dose     | 0.82     | 0.72         | 0.92         | 0                                   |      |
| Black                                   | 1st dose                                         | 0.83         | 0.8      | 0.86         | 0            |                                     |      |
|                                         | 2nd dose                                         | 0.89         | 0.76     | 1.03         | 0.01         |                                     |      |
|                                         | 3rd dose                                         | 0.72         | 0.61     | 0.85         | 0            |                                     |      |
| Unknown                                 | 1st dose                                         | 0.57         | 0.22     | 1.5          | 0.48         |                                     |      |
|                                         | 2nd dose                                         | 0.9          | 0.69     | 1.18         | 0.03         |                                     |      |
|                                         | 3rd dose                                         | 1.05         | 0.8      | 1.39         | 0.03         |                                     |      |

Supplementary Table 8 Adjusted hazard ratio and 95% confidence intervals from the meta-analysis for study period ending 31st December 2022. This analysis includes Northern Ireland, Scotland and Wales. Ethnicity results are for Scotland and Wales only.

| Variable                                  | Type             | Transition | aHR      | 95% CI lower | 95% CI upper | Between study variance ( $\tau^2$ ) |      |
|-------------------------------------------|------------------|------------|----------|--------------|--------------|-------------------------------------|------|
| Age                                       | 5-11             | 1st dose   | 0.05     | 0.02         | 0.14         | 0.74                                |      |
|                                           |                  | 2nd dose   | 0.5      | 0.42         | 0.59         | 0.02                                |      |
|                                           |                  | 3rd dose   | 0.47     | 0.41         | 0.54         | 0.01                                |      |
|                                           | 12-15            | 1st dose   | 0.7      | 0.46         | 1.09         | 0.15                                |      |
|                                           |                  | 2nd dose   | 0.2      | 0.11         | 0.37         | 0.3                                 |      |
|                                           |                  | 3rd dose   | 0.92     | 0.88         | 0.95         | 0                                   |      |
|                                           | Sex              | Male       | 1st dose | 0.95         | 0.92         | 0.98                                | 0    |
|                                           |                  |            | 2nd dose | 0.95         | 0.91         | 1                                   | 0    |
|                                           |                  |            | 3rd dose | 0.89         | 0.79         | 1                                   | 0.01 |
| n2                                        |                  | 1st dose   | 0.96     | 0.93         | 0.99         | 0                                   |      |
|                                           |                  | 2nd dose   | 0.97     | 0.9          | 1.06         | 0                                   |      |
|                                           |                  | 3rd dose   | 1.1      | 1.04         | 1.17         | 0                                   |      |
| n4                                        |                  | 1st dose   | 1.04     | 1.03         | 1.05         | 0                                   |      |
|                                           |                  | 2nd dose   | 0.97     | 0.95         | 0.99         | 0                                   |      |
|                                           |                  | 3rd dose   | 0.98     | 0.84         | 1.15         | 0.02                                |      |
| n5+                                       | 1st dose         | 0.94       | 0.92     | 0.96         | 0            |                                     |      |
|                                           | 2nd dose         | 0.85       | 0.79     | 0.91         | 0            |                                     |      |
|                                           | 3rd dose         | 0.25       | 0.19     | 0.34         | 0.07         |                                     |      |
| Vaccination status of adults in household | Unvaccinated     | 1st dose   | 0.72     | 0.57         | 0.9          | 0.04                                |      |
|                                           |                  | 2nd dose   | 0.54     | 0.43         | 0.7          | 0.02                                |      |
|                                           |                  | 3rd dose   | 2.01     | 1.48         | 2.74         | 0.07                                |      |
|                                           | Fully vaccinated | 1st dose   | 1.91     | 0.93         | 3.94         | 0.41                                |      |
|                                           |                  | 2nd dose   | 1.35     | 1.25         | 1.47         | 0                                   |      |
|                                           |                  | 3rd dose   | 0.78     | 0.72         | 0.84         | 0                                   |      |
| Urban - rural classification              | Rural            | 1st dose   | 0.87     | 0.82         | 0.91         | 0                                   |      |
|                                           |                  | 2nd dose   | 0.89     | 0.82         | 0.97         | 0                                   |      |
|                                           |                  | 3rd dose   | 0.91     | 0.85         | 0.98         | 0                                   |      |
|                                           | 1 Most           | 1st dose   | 0.95     | 0.9          | 1            | 0                                   |      |
|                                           |                  | 2nd dose   | 0.95     | 0.87         | 1.05         | 0.01                                |      |
|                                           |                  | 3rd dose   | 1.11     | 1.09         | 1.13         | 0                                   |      |
| IMD 2019 quintile                         | 2                | 1st dose   | 1.09     | 1.04         | 1.15         | 0                                   |      |
|                                           |                  | 2nd dose   | 1.07     | 1.01         | 1.15         | 0                                   |      |
|                                           |                  | 3rd dose   | 1.32     | 1.28         | 1.37         | 0                                   |      |
|                                           | 4                | 1st dose   | 1.22     | 1.11         | 1.34         | 0.01                                |      |
|                                           |                  | 2nd dose   | 1.23     | 1.2          | 1.27         | 0                                   |      |
|                                           |                  | 3rd dose   | 0.99     | 0.96         | 1.02         | 0                                   |      |
| 5 Least                                   | 1st dose         | 0.94       | 0.93     | 0.96         | 0            |                                     |      |
|                                           | 2nd dose         | 0.87       | 0.79     | 0.96         | 0.01         |                                     |      |
|                                           | 3rd dose         | 1.31       | 1.29     | 1.33         | 0            |                                     |      |
|                                           | Asian            | 1st dose   | 1.09     | 0.98         | 1.22         | 0.01                                |      |
|                                           |                  | 2nd dose   | 1.03     | 0.98         | 1.08         | 0                                   |      |
|                                           |                  | 3rd dose   | 0.9      | 0.85         | 0.96         | 0                                   |      |
| Ethnicity                                 | Mixed            | 1st dose   | 0.96     | 0.89         | 1.04         | 0                                   |      |
|                                           |                  | 2nd dose   | 1        | 0.92         | 1.07         | 0                                   |      |
|                                           |                  | 3rd dose   | 0.9      | 0.87         | 0.93         | 0                                   |      |
|                                           | Other            | 1st dose   | 0.94     | 0.8          | 1.11         | 0.01                                |      |
|                                           |                  | 2nd dose   | 0.82     | 0.73         | 0.93         | 0                                   |      |
|                                           |                  | 3rd dose   | 0.83     | 0.8          | 0.86         | 0                                   |      |
| Black                                     | 1st dose         | 0.9        | 0.81     | 1.01         | 0            |                                     |      |
|                                           | 2nd dose         | 0.73       | 0.63     | 0.85         | 0            |                                     |      |
|                                           | 3rd dose         | 0.58       | 0.22     | 1.51         | 0.48         |                                     |      |
| Unknown                                   | 1st dose         | 0.89       | 0.69     | 1.16         | 0.03         |                                     |      |
|                                           | 2nd dose         | 1.05       | 0.79     | 1.39         | 0.03         |                                     |      |
|                                           | 3rd dose         | 0.05       | 0.02     | 0.14         | 0.74         |                                     |      |

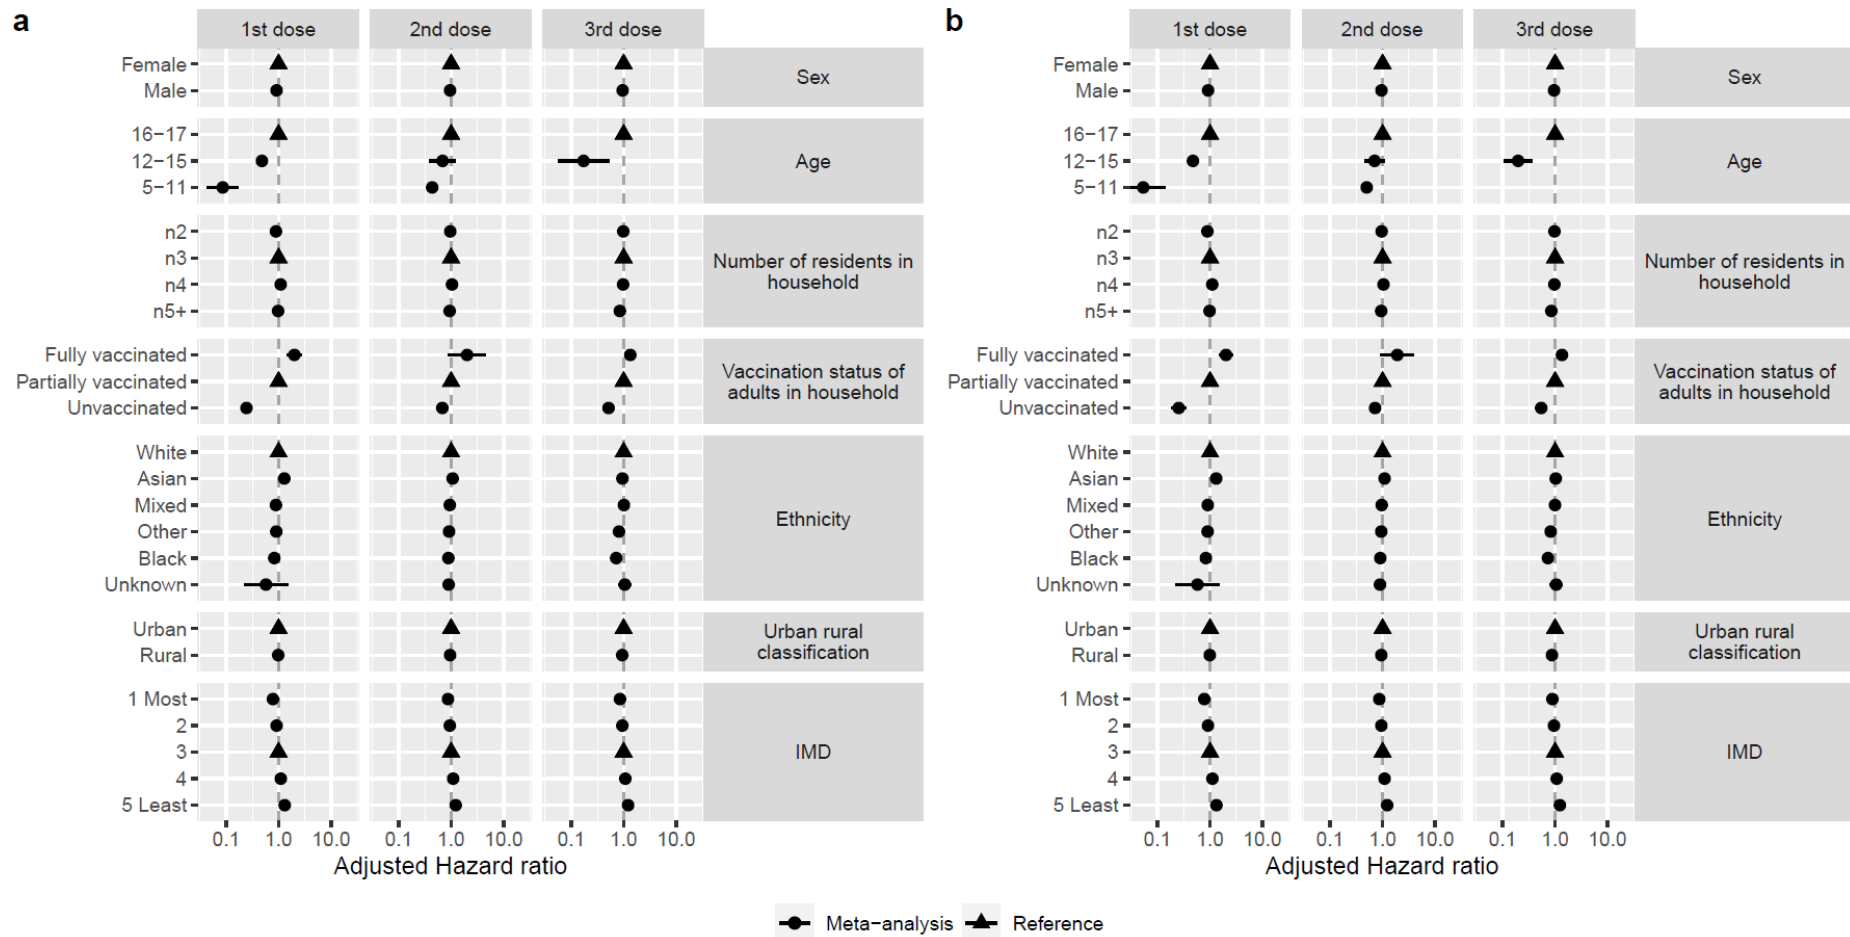

Supplementary Figure 5 Meta-analysis results, adjusted hazard ratio coefficients and 95% confidence intervals produced from the random effects model for Northern Ireland, Scotland and Wales (Northern Ireland were not included in the ethnicity analysis) for a. the 4th August 2021 – 31st May 2022 study period and b. the 4th August – 31st December study period. The data used to generate these plots is available in tables 7 (plot a) and 8 (plot b).

## Cohort selection

All cohorts generated by each nation were subjected to the following parameters to clean the data.

- In cohort between July 2021 and May 2022 (this allows us to determine if they were infected up to 28 days prior to the start of the study).
- Has week of birth and sex recorded
- Is aged between 5 and 17 between Aug 2021 and May 2022
- Is resident in country of analysis from Jan 2020
- Has unique residential ID
- Household less than 10
- Minimum of 1 adult in household
- Registered with GP accessible to the countries data linkage.
- Does not have a hospital spell of more than 1 week during study period
- Has good vaccine records (UK vaccination, valid vaccine name and date, before today, valid dose sequence, minimum 28 days between vaccinations)
- If CYP has 1<sup>st</sup> and 2<sup>nd</sup> dose then with ChAdOx1 adenoviral (Oxford-AstraZeneca), mRNA-1273 (Moderna) or BNT162b2 mRNA (PfizerBioNTech)
- If CYP has booster then with Oxford-AstraZeneca, Moderna or PfizerBioNTech
- Date of dose 1 is after age group eligibility
